# Supplementary material for: Facile route to achieve bifunctional electrocatalysts for oxygen reduction and evolution reactions derived from CeO2encapsulated by the zeolitic imidazolate framework-67
Source: Royal Society of Chemistry journal article supplement (doi:10.1039/c9qi01025d), 2019-01-01
Supplement: c9qi01025d1.pdf [file c9qi01025d1.pdf]

**-Electronic Supplementary Information-**

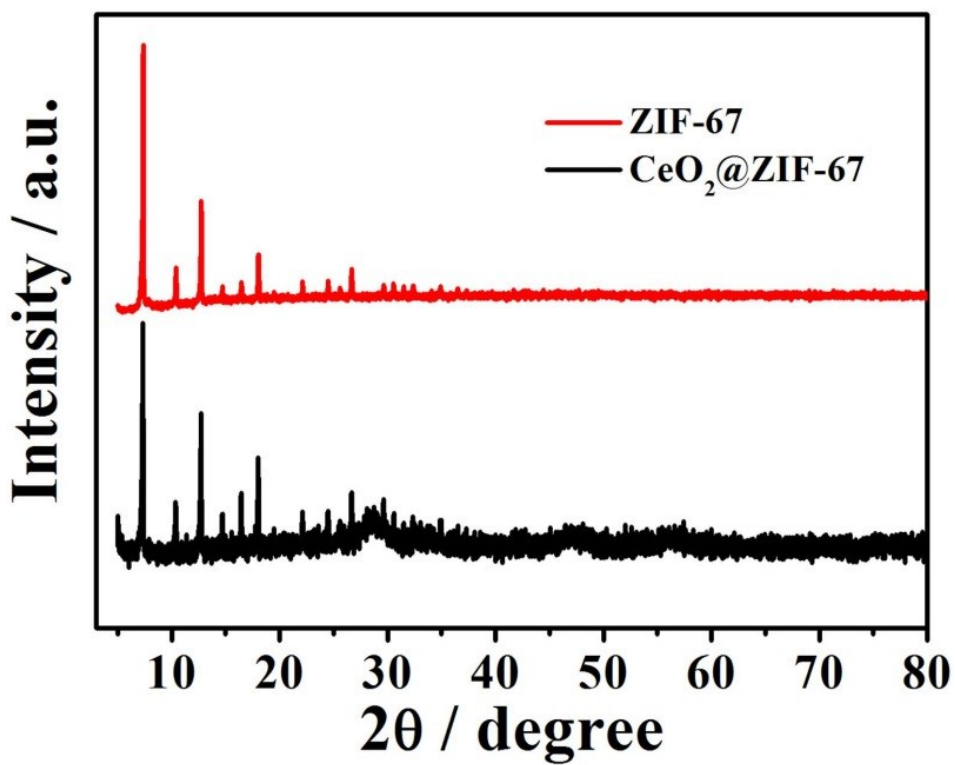

**Fig. S1.** XRD patterns of ZIF-67 and CeO<sub>2</sub>@ZIF-67.

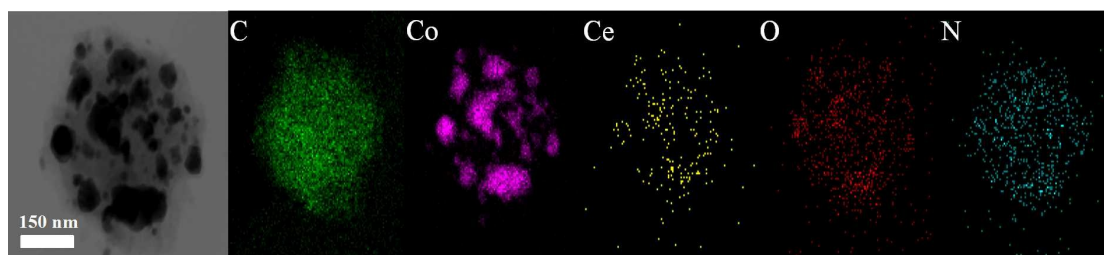

**Fig. S2.** The element mapping for C, Co, Ce, O, N in CeO<sub>2</sub>/Co@N-C.

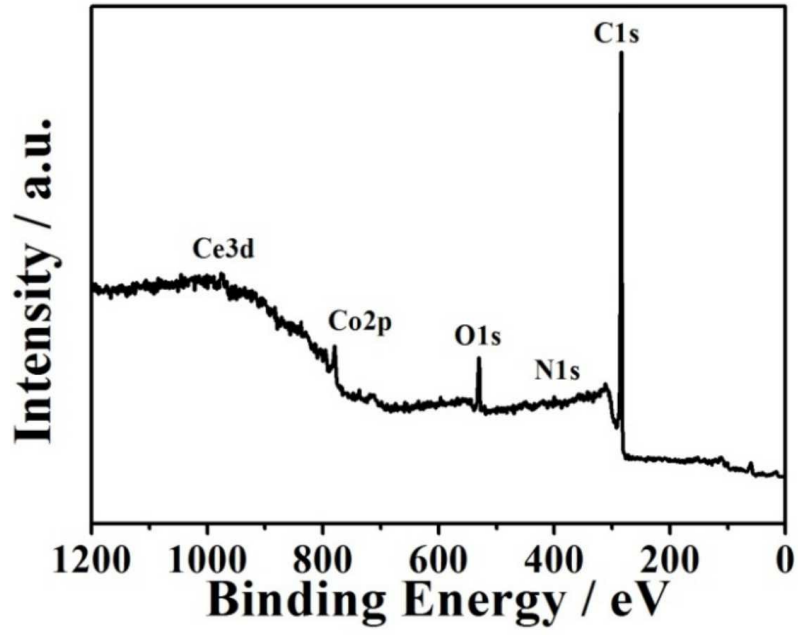

Fig. S3. XPS survey spectrum of  $\text{CeO}_2/\text{Co@N-C}$ .

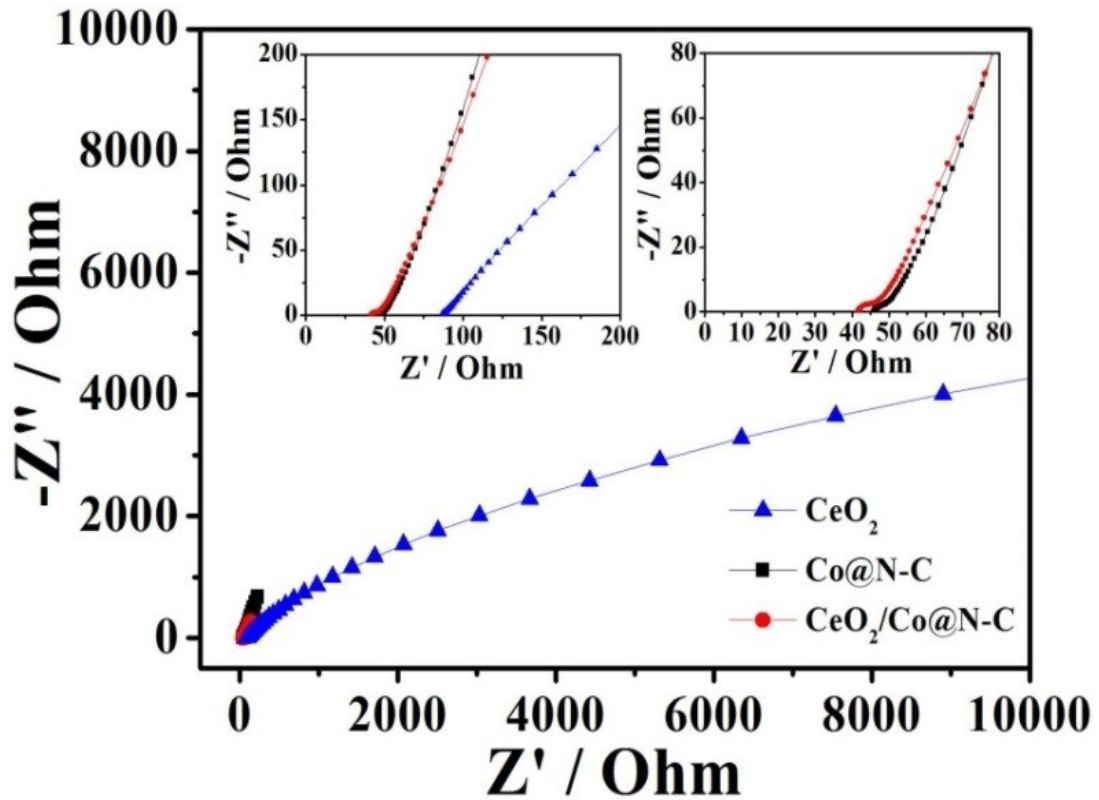

Fig. S4. Electrochemical impedance spectroscopy measurements: Nyquist plots of  $\text{CeO}_2$ ,  $\text{Co@N-C}$  and  $\text{CeO}_2/\text{Co@N-C}$ .

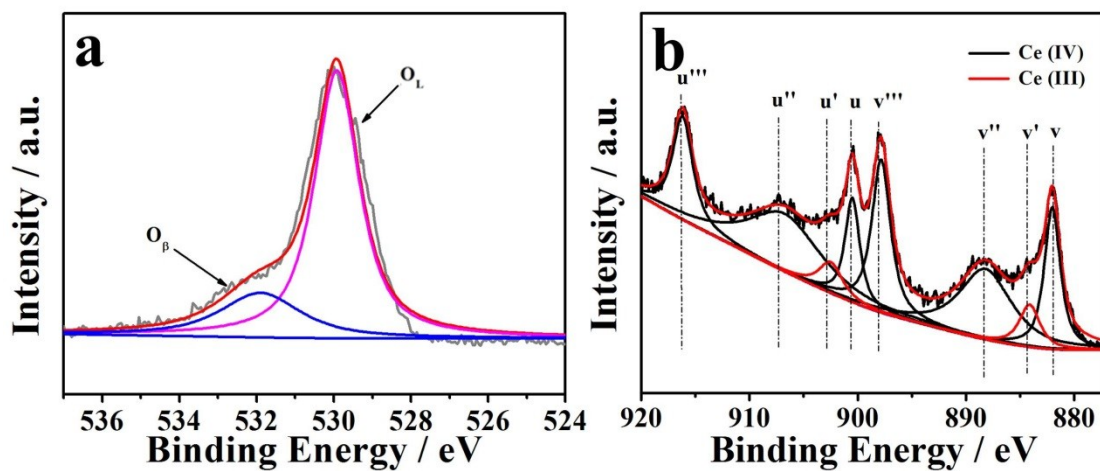

Fig. S5. XPS high-resolution spectra of O 1s (a) and Ce 3d (b) of  $\text{CeO}_2$ .

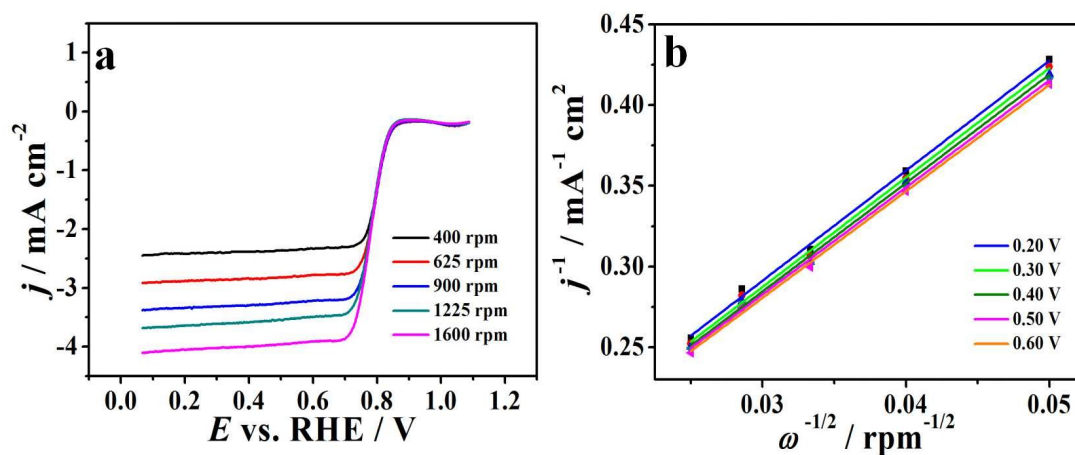

Fig. S6. (a) ORR LSV curves for Co@N-C at different rotation rates and (b) the corresponding Koutecky-Levich (K-L) plots at different potentials. All the ORR measurements were performed in  $\text{O}_2$ -saturated 0.1 M KOH solution.

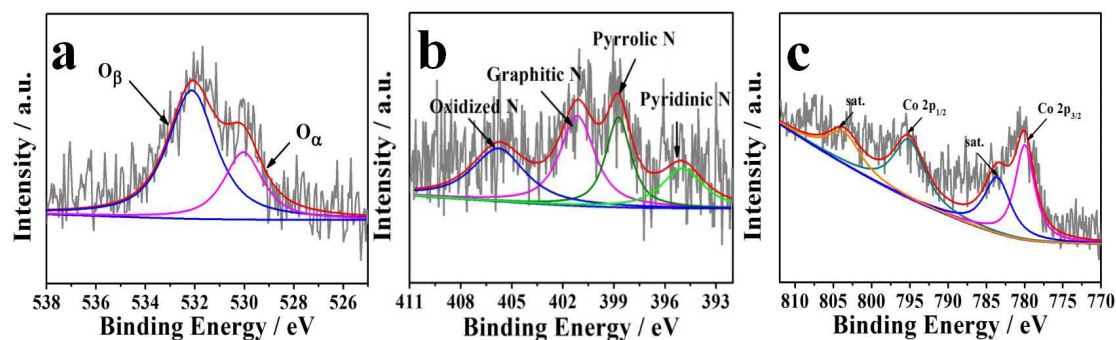

Fig. S7. XPS high-resolution spectra of O 1s (a), N 1s (b) and Co 2p (c) of Co@N-C.

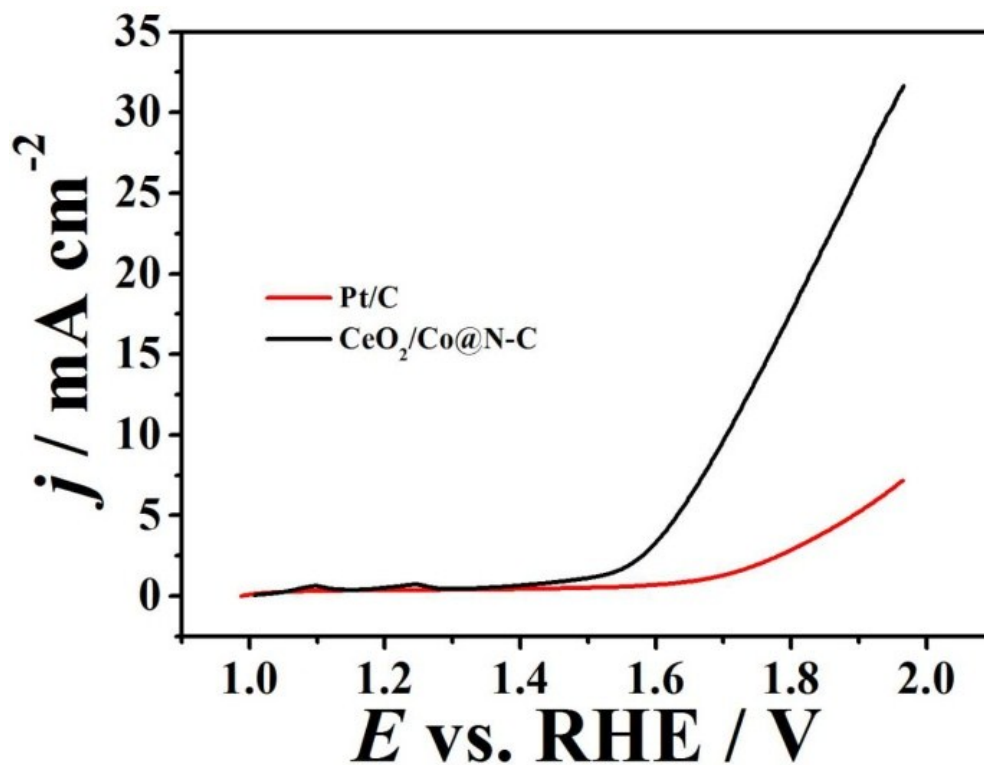

**Fig. S8.** OER LSV curves for CeO<sub>2</sub>/Co@N-C and Pt/C at scanning rate of 10 mV s<sup>-1</sup> in 0.1 M KOH.

**Table S1** Comparison of ORR/ OER performances of reported CeO<sub>2</sub>-based electrocatalysts

| Catalyst                                              | $E_{\text{onset, ORR}}$ (V) | $E_{1/2, \text{ORR}}$ (V) | $n_{\text{ORR}}$ | electrolyte | $E_{j=10, \text{OER}}$ (V) | electrolyte | Reference |
|-------------------------------------------------------|-----------------------------|---------------------------|------------------|-------------|----------------------------|-------------|-----------|
| CeO <sub>2</sub> /Co@N-C                              | 0.998                       | 0.934                     | 3.98             | 0.1 M       | 1.704                      | 0.1 M       | This work |
| Co-CeO <sub>2</sub> -N-C                              | 0.89                        | 0.82                      | 3.96             | 0.1 M       | 1.556                      | 1.0 M       | 1         |
| CeO <sub>2</sub> /Co <sub>3</sub> O <sub>4</sub> @N-C | 0.97                        | 0.86                      | 3.94             | 0.1 M       | 1.504                      | 0.1 M       | 2         |
| CeO <sub>2</sub> /rGO                                 | 0.946                       | 0.84                      | 3.3-3.5          | 0.1 M       | 1.72                       | 0.1 M       | 3         |
| 0.5Co-NC-CeO <sub>2</sub>                             | 0.875                       | 0.817                     | 3.97             | 0.1 M       | -                          | -           | 4         |
| 5 wt% Pt-CeO <sub>x</sub>                             | 0.89                        | 0.75                      | 4.1              | 0.1 M       | -                          | -           | 5         |
| NW/C                                                  |                             |                           |                  |             |                            |             |           |
| Co <sub>3</sub> O <sub>4</sub> -CeO <sub>2</sub> /C   | 0.93                        | 0.83                      | 3.91             | 0.1 M       | -                          | -           | 6         |
| CeO <sub>2</sub> @PIZA-1-400                          | -                           | -                         | -                | -           | 1.6                        | 1.0 M       | 7         |
| Ni <sub>4</sub> Ce <sub>1</sub> @CP                   | -                           | -                         | -                | -           | 1.45                       | 1.0 M       | 8         |
| Ag-CeO <sub>2</sub> /VXV-72                           | 0.905                       | 0.717                     | 3.46             | 0.1 M       | -                          | -           | 9         |
| Ce-HPCNs                                              | 0.923                       | 0.831                     | 3.87             | 0.1 M       | -                          | -           | 10        |
| MnO <sub>x</sub> -CeO <sub>2</sub> /KB                | 0.94                        | 0.81                      | ~4               | 0.1 M       | -                          | -           | 11        |
| CeO <sub>2</sub> nanowires                            | 0.756                       | 0.666                     | -                | 0.1 M       | 1.934                      | 0.1 M       | 12        |
| Co-CeO <sub>2</sub> /N-CNR                            | 0.87                        | 0.83                      | 3.95             | 0.1 M       | 1.64                       | 0.1 M       | 13        |
| CeGS                                                  | 0.92                        | 0.81                      | ~4               | 0.1 M       | -                          | -           | 14        |

## References

1. Z. Zhang, D. Gao, D. Xue, Y. Liu, P. Liu, J. Zhang and J. Qian, *Nanotechnology*, 2019, **30**, 395401.
2. X. He, X. Yi, F. Yin, B. Chen, G. Li and H. Yin, *Journal of Materials Chemistry A*, 2019, **7**, 6753-6765.
3. L. Sun, L. Zhou, C. Yang and Y. Yuan, *International Journal of Hydrogen Energy*, 2017, **42**, 15140-15148.
4. X. Wang, J. Xu, Z. Wu, M. Zhi, Z. Hong and F. Huang, *ChemNanoMat*, 2019, **5**, 831-837.
5. S. Chauhan, T. Mori, T. Masuda, S. Ueda, G. J. Richards, J. P. Hill, K. Ariga, N. Isaka, G. Auchterlonie and J. Drennan, *ACS Appl Mater Interfaces*, 2016, **8**, 9059-9070.
6. K. Liu, X. Huang, H. Wang, F. Li, Y. Tang, J. Li and M. Shao, *ACS Appl Mater Interfaces*, 2016, **8**, 34422-34430.
7. D.-J. Li, Z.-G. Gu, W. Zhang, Y. Kang and J. Zhang, *Journal of Materials Chemistry A*, 2017, **5**, 20126-20130.
8. D. Zhao, Y. Pi, Q. Shao, Y. Feng, Y. Zhang and X. Huang, *ACS Nano*, 2018, **12**, 6245-6251.
9. S. Sun, Y. Xue, Q. Wang, S. Li, H. Huang, H. Miao and Z. Liu, *Chem Commun (Camb)*, 2017, **53**, 7921-7924.
10. W. Xia, J. Li, T. Wang, L. Song, H. Guo, H. Gong, C. Jiang, B. Gao and J. He, *Chem Commun (Camb)*, 2018, **54**, 1623-1626.
11. J. Chen, N. Zhou, H. Wang, Z. Peng, H. Li, Y. Tang and K. Liu, *Chem Commun (Camb)*, 2015, **51**, 10123-10126.
12. Y. Yang, T. Yue, Y. Wang, Z. Yang and X. Jin, *Microchemical Journal*, 2019, **148**, 42-50.
13. A. Sivanantham, P. Ganesan and S. Shanmugam, *Applied Catalysis B: Environmental*, 2018, **237**, 1148-1159.
14. Y. Yu, X. Wang, W. Gao, P. Li, W. Yan, S. Wu, Q. Cui, W. Song and K. Ding, *Journal of Materials Chemistry A*, 2017, **5**, 6656-6663.
